# Supplementary material for: Progressive stenosis and radiological findings of vasculitis over the entire internal carotid artery in moyamoya vasculopathy associated with graves’ disease: a case report and review of the literature
Source: Springer Nature journal article supplement (doi:10.1186/s12883-019-1262-1), 2019-03-02

First episode

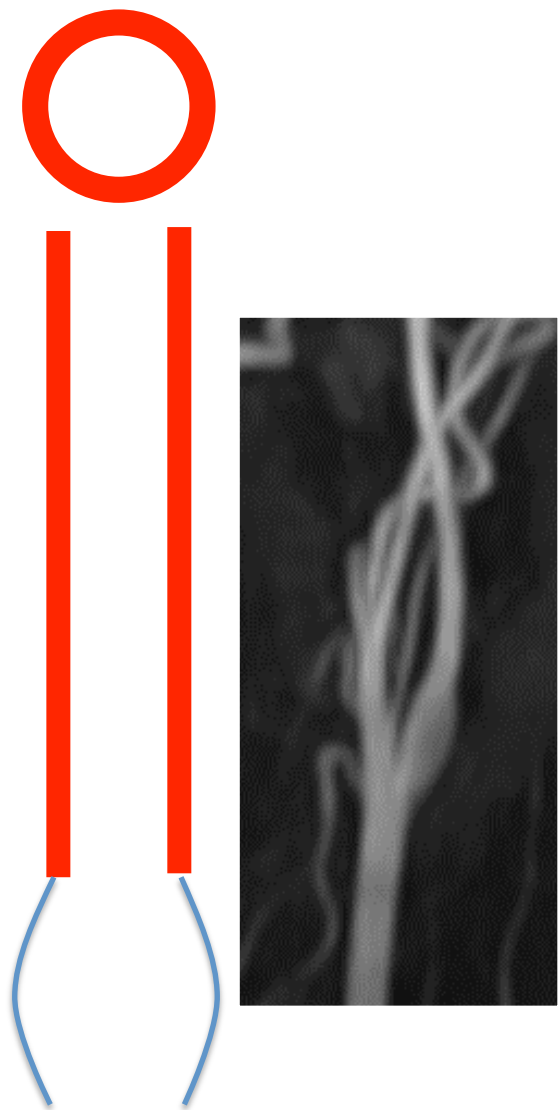

Second episode  
During progression

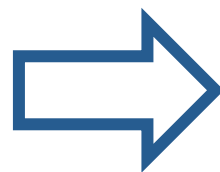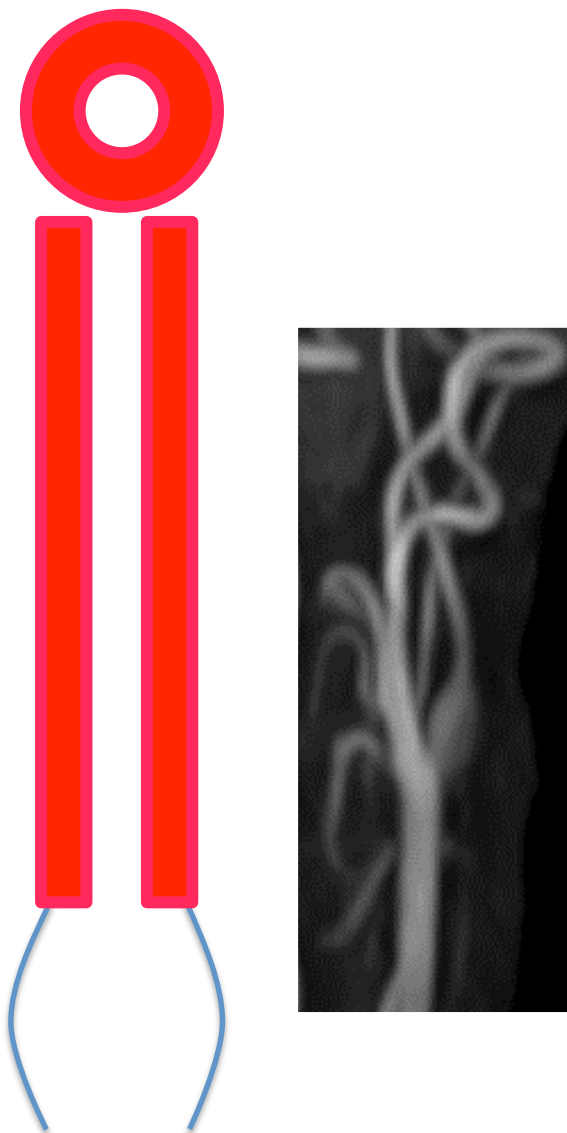

Supplement: MOESM3 [file 16522030]
